# Supplementary material for: Changes in Nutrient Components and Digestive Enzymatic Inhibition Activities in Soy Leaves by Ethephon Treatment
Source: MDPI journal article supplement (doi:10.3390/plants12203640), 2023-10-21
Supplement: s1 [file s1]

**Table S1.** Comparison of fatty acid contents in soybean leaves by ethephon treatment

| Contents <sup>1</sup> (mg/100 g) | Treatment concentration of ethephon <sup>3</sup> (µg/mL) |                             |                             |
|----------------------------------|----------------------------------------------------------|-----------------------------|-----------------------------|
|                                  | SL1                                                      | SL2                         | SL3                         |
| Saturated fatty acids (SFA)      |                                                          |                             |                             |
| Palmitic acid (C16:0)            | 212.30 ± 10.62 <sup>a</sup>                              | 224.80 ± 16.74 <sup>a</sup> | 191.20 ± 9.56 <sup>b</sup>  |
| Stearic acid (C18:0)             | 65.70 ± 3.29 <sup>b</sup>                                | 70.50 ± 4.03 <sup>a</sup>   | 52.70 ± 2.64 <sup>c</sup>   |
| Arachidic acid (C20:0)           | 4.80 ± 0.24 <sup>b</sup>                                 | 5.30 ± 0.22 <sup>a</sup>    | 5.00 ± 0.25 <sup>b</sup>    |
| Behenic acid (C22:0)             | 6.50 ± 0.33 <sup>c</sup>                                 | 8.50 ± 0.38 <sup>a</sup>    | 7.30 ± 0.37 <sup>b</sup>    |
| Lignoceric acid (C24:0)          | 8.40 ± 0.42 <sup>c</sup>                                 | 10.70 ± 0.44 <sup>a</sup>   | 10.00 ± 0.50 <sup>b</sup>   |
| Total                            | 297.70                                                   | 319.80                      | 266.20                      |
| Unsaturated fatty acids (USFA)   |                                                          |                             |                             |
| Palmitoleic acid (C16:1)         | 31.50 ± 1.57 <sup>a</sup>                                | 32.00 ± 1.60 <sup>a</sup>   | 21.10 ± 1.06 <sup>b</sup>   |
| Oleic acid (C18:1n9c)            | 90.00 ± 4.5 <sup>ab</sup>                                | 87.30 ± 3.37 <sup>b</sup>   | 93.70 ± 4.69 <sup>a</sup>   |
| Linoleic acid (C18:2n6c)         | 163.50 ± 8.18 <sup>a</sup>                               | 167.40 ± 13.37 <sup>a</sup> | 161.50 ± 8.08 <sup>a</sup>  |
| γ-Linolenic acid (C18:3n6)       | 3.10 ± 0.16 <sup>a</sup>                                 | nd <sup>2</sup>             | nd                          |
| α-Linolenic acid (C18:3n3)       | 383.80 ± 19.19 <sup>b</sup>                              | 419.60 ± 40.98 <sup>a</sup> | 447.10 ± 22.36 <sup>a</sup> |
| Eicosenic acid (C20:1)           | 2.70 ± 0.14 <sup>b</sup>                                 | 4.10 ± 0.21 <sup>a</sup>    | 1.70 ± 0.09 <sup>c</sup>    |
| Eicosatrienoic acid (C20:3n3)    | 1.90 ± 0.10 <sup>c</sup>                                 | 3.80 ± 0.19 <sup>a</sup>    | 2.90 ± 0.15 <sup>b</sup>    |
| Nervonic acid (C24:1)            | 2.70 ± 0.14 <sup>b</sup>                                 | 3.70 ± 0.39 <sup>a</sup>    | 2.50 ± 0.13 <sup>c</sup>    |
| Total                            | 679.20                                                   | 717.90                      | 730.50                      |
| Total fatty acids                | 976.90                                                   | 1037.70                     | 996.70                      |

<sup>1</sup> All values are presented as the mean±SD of triplicate determination. Means with different letters within a row are significantly different between sample for the same index (p < 0.05)

<sup>2</sup> nd: not detected.

<sup>3</sup> Ethephon treatments at 0 µg/mL, SL1; Ethephon treatments at 150 µg/mL, SL2; Ethephon treatments at 300 µg/mL, SL3.

**Table S2.** Comparison of free amino acid contents in soy leaves by ethephon treatment

| Contents <sup>1</sup> (mg/100 g) | Treatment concentration of ethephon <sup>3</sup> (µg/mL) |                              |                             |
|----------------------------------|----------------------------------------------------------|------------------------------|-----------------------------|
|                                  | SL1                                                      | SL2                          | SL3                         |
| Non-essential amino acids (NEAA) |                                                          |                              |                             |
| Taurine                          | 7.20 ± 0.43 <sup>c</sup>                                 | 8.40 ± 0.50 <sup>b</sup>     | 9.20 ± 0.55 <sup>a</sup>    |
| Urea                             | 79.40 ± 4.76 <sup>c</sup>                                | 158.00 ± 9.48 <sup>b</sup>   | 304.40 ± 18.26 <sup>a</sup> |
| Aspartic acid                    | 174.20 ± 10.45 <sup>b</sup>                              | 179.80 ± 10.79 <sup>ab</sup> | 189.60 ± 11.38 <sup>a</sup> |
| Serine                           | 69.20 ± 4.15 <sup>c</sup>                                | 79.20 ± 4.75 <sup>b</sup>    | 132.80 ± 7.97 <sup>a</sup>  |
| Glutamic acid                    | 65.80 ± 3.95 <sup>c</sup>                                | 88.00 ± 5.25 <sup>b</sup>    | 132.80 ± 7.97 <sup>a</sup>  |
| Sarcosine                        | nd <sup>2</sup>                                          | 2.40 ± 0.14 <sup>a</sup>     | nd                          |
| Aminoadipic acid                 | 32.80 ± 1.97 <sup>c</sup>                                | 42.80 ± 2.57 <sup>b</sup>    | 57.20 ± 3.34 <sup>a</sup>   |
| Glycine                          | 14.60 ± 0.88 <sup>c</sup>                                | 20.60 ± 1.24 <sup>a</sup>    | 19.40 ± 1.16 <sup>a</sup>   |
| Alanine                          | 116.80 ± 7.01 <sup>a</sup>                               | 90.60 ± 5.44 <sup>c</sup>    | 108.60 ± 6.52 <sup>b</sup>  |
| Citrulline                       | 3.60 ± 0.22 <sup>b</sup>                                 | 6.20 ± 0.37 <sup>a</sup>     | 6.20 ± 0.37 <sup>a</sup>    |
| α-aminobutyric acid              | 6.80 ± 0.41 <sup>c</sup>                                 | 9.00 ± 0.54 <sup>b</sup>     | 10.40 ± 0.62 <sup>a</sup>   |
| Cystathionine                    | 4.40 ± 0.26 <sup>c</sup>                                 | 6.60 ± 0.40 <sup>a</sup>     | 5.00 ± 0.30 <sup>b</sup>    |
| Tyrosine                         | 52.80 ± 3.17 <sup>a</sup>                                | 29.20 ± 1.75 <sup>c</sup>    | 45.80 ± 2.75 <sup>b</sup>   |
| β-alanine                        | 21.60 ± 1.30 <sup>a</sup>                                | 22.80 ± 1.37 <sup>a</sup>    | 18.20 ± 1.09 <sup>b</sup>   |
| β-aminoisobutyric acid           | 18.00±1.08                                               | 23.40 ± 1.40 <sup>a</sup>    | nd                          |
| γ-aminobutyric acid              | 141.00±8.46 <sup>b</sup>                                 | 182.20 ± 10.93 <sup>a</sup>  | 182.60 ± 10.96 <sup>a</sup> |
| Aminoethanol                     | 8.80±0.53 <sup>b</sup>                                   | 7.20 ± 0.43 <sup>c</sup>     | 10.40 ± 0.62 <sup>a</sup>   |
| Hydroxyproline                   | 0.80±0.05 <sup>c</sup>                                   | 1.40 ± 0.08 <sup>a</sup>     | 1.00 ± 0.06 <sup>b</sup>    |
| Ornithine                        | 1.40±0.08 <sup>c</sup>                                   | 1.60 ± 0.10 <sup>b</sup>     | 2.60 ± 0.16 <sup>a</sup>    |
| 1-Methylhistidine                | 3.20±0.19 <sup>b</sup>                                   | 5.20 ± 0.31 <sup>a</sup>     | 3.40 ± 0.20 <sup>b</sup>    |
| Arginine                         | 141.00±8.46 <sup>b</sup>                                 | 82.40 ± 4.94 <sup>c</sup>    | 192.00 ± 11.52 <sup>a</sup> |
| Total                            | 963.40                                                   | 1,047.00                     | 1,431.60                    |
| Essential amino acids (EAA)      |                                                          |                              |                             |
| Threonine                        | 30.40 ± 1.82 <sup>c</sup>                                | 58.60 ± 3.52 <sup>a</sup>    | 52.40 ± 3.14 <sup>b</sup>   |
| Valine                           | 115.80 ± 6.95 <sup>c</sup>                               | 126.20 ± 7.57 <sup>b</sup>   | 166.40 ± 9.98 <sup>a</sup>  |
| Methionine                       | 11.20 ± 0.67 <sup>b</sup>                                | 12.40 ± 0.74 <sup>a</sup>    | 11.00 ± 0.66 <sup>b</sup>   |
| Isoleucine                       | 62.20 ± 3.37 <sup>c</sup>                                | 71.40 ± 4.28 <sup>b</sup>    | 82.60 ± 4.96 <sup>a</sup>   |
| Leucine                          | 61.40 ± 3.68 <sup>b</sup>                                | 93.00 ± 5.58 <sup>a</sup>    | 95.60 ± 5.74 <sup>a</sup>   |
| Phenylalanine                    | 84.00 ± 5.04 <sup>c</sup>                                | 108.60 ± 6.52 <sup>b</sup>   | 157.00 ± 9.42 <sup>a</sup>  |
| Lysine                           | 58.20 ± 3.49 <sup>b</sup>                                | 33.20 ± 1.99 <sup>c</sup>    | 68.80 ± 4.13 <sup>a</sup>   |
| Histidine                        | 26.40 ± 1.58 <sup>b</sup>                                | 19.40 ± 1.16 <sup>c</sup>    | 35.00 ± 2.10 <sup>a</sup>   |
| Total                            | 449.60                                                   | 522.80                       | 668.80                      |
| Total amino acids                | 1413.00                                                  | 1569.80                      | 2100.40                     |

<sup>1</sup> All values are presented as the mean±SD of triplicate determination. Means with different letters within a row are significantly different between sample for the same index (p < 0.05)

<sup>2</sup> nd: not detected.

<sup>3</sup> Ethephon treatments at 0 µg/mL, SL1; Ethephon treatments at 150 µg/mL, SL2; Ethephon treatments at 300 µg/mL, SL3.
